# Supplementary material for: Preparation of Ag nanoparticles by spark ablation in gas as catalysts for electrocatalytic hydrogen production
Source: Royal Society of Chemistry journal article supplement (doi:10.1039/d0ra06682f), 2020-01-01
Supplement: d0ra06682f1.pdf [file d0ra06682f1.pdf]

# Preparation of Ag nanoparticles by spark ablation in gas as catalysts for electrocatalytic hydrogen production

Junda Lu<sup>†</sup>, Guangfa Yu<sup>†</sup>, Jia Guo<sup>†</sup>, Shihao Song<sup>†</sup>, Hui Liu<sup>‡,\*</sup>, Xiaojing Yang<sup>†,\*</sup>, Zunming Lu<sup>†,\*</sup>

<sup>†</sup>School of Materials Science and Engineering, Hebei University of Technology, Tianjin 300130, China

<sup>‡</sup>School of Materials Science and Engineering, Tianjin University, Tianjin 300072, China

## Supporting information

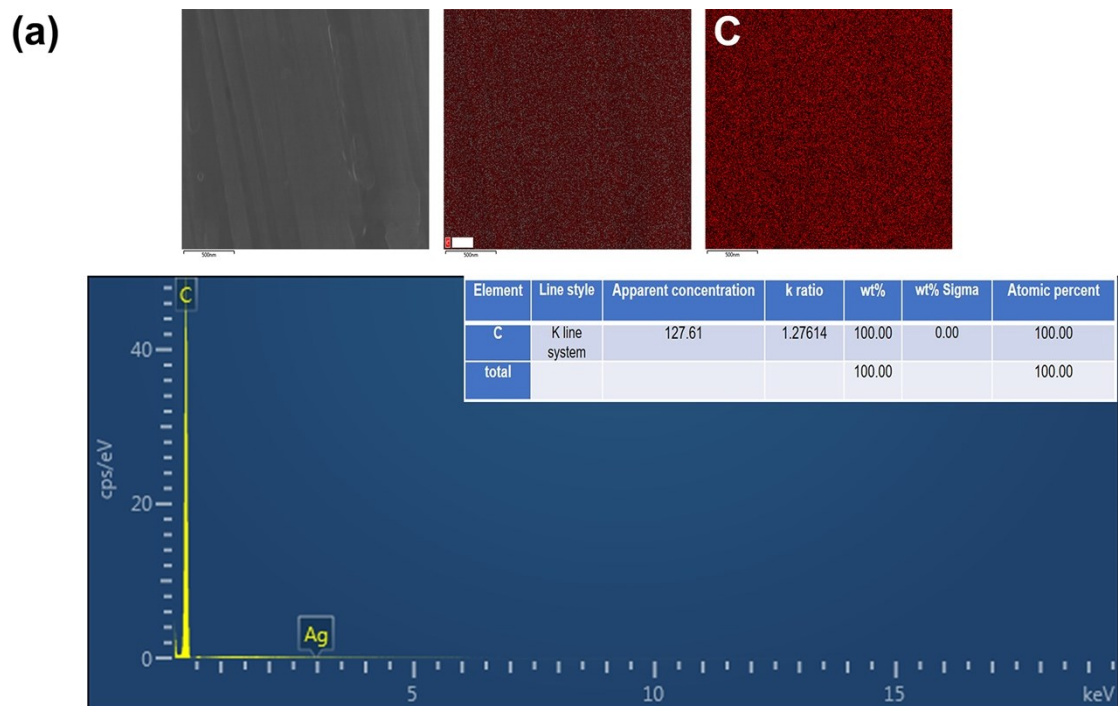

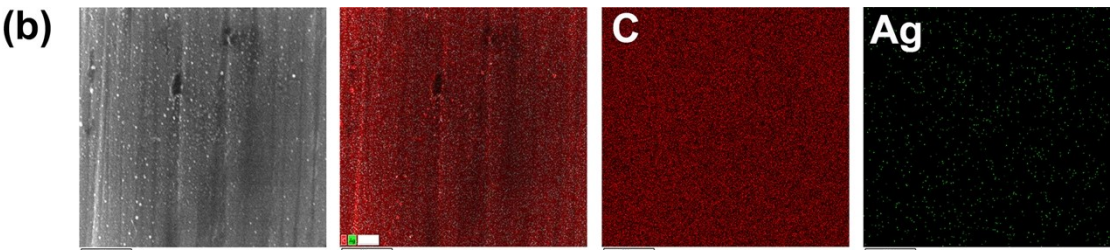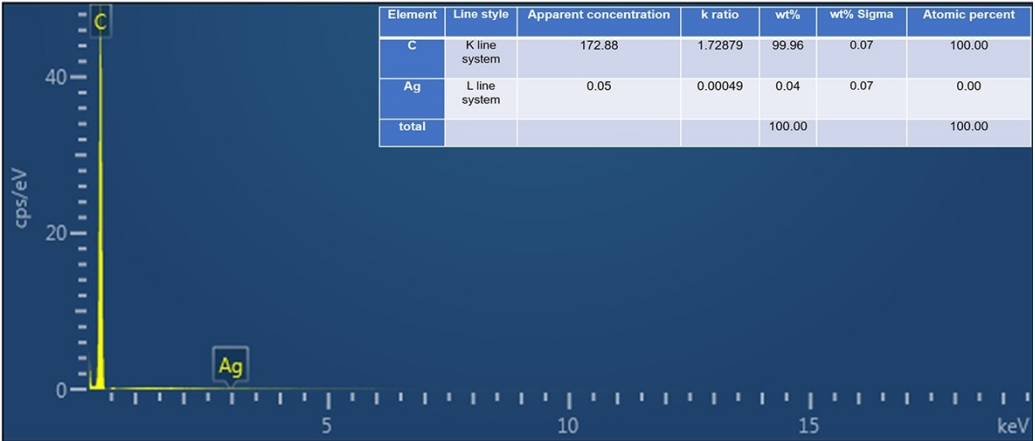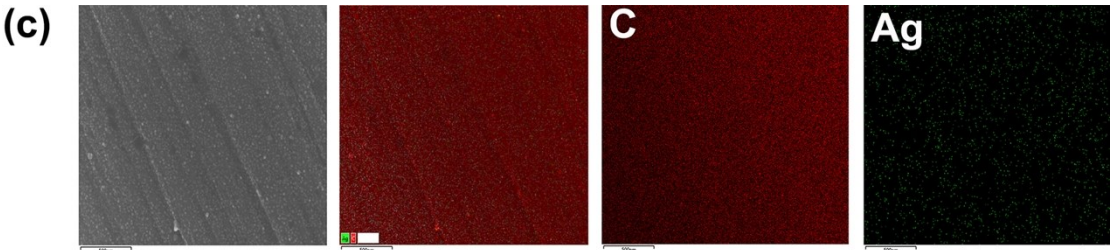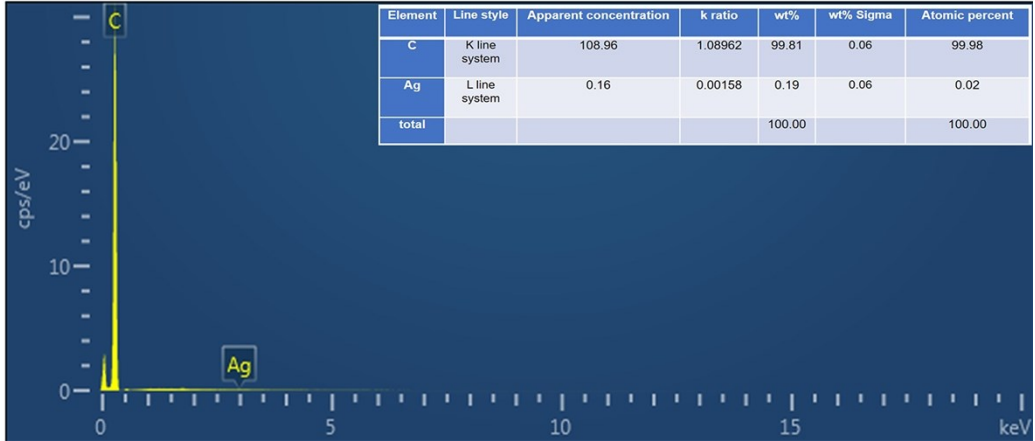

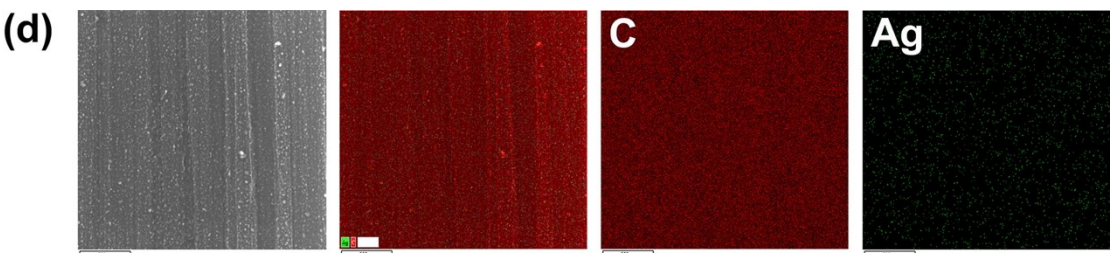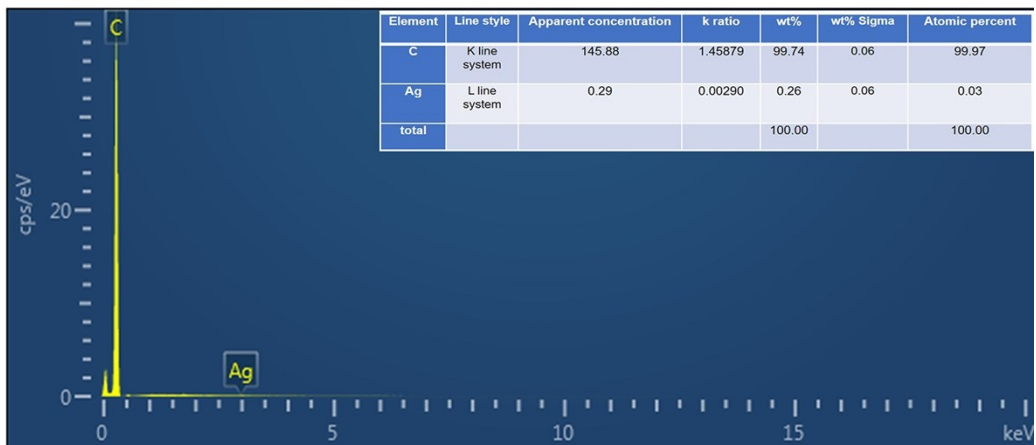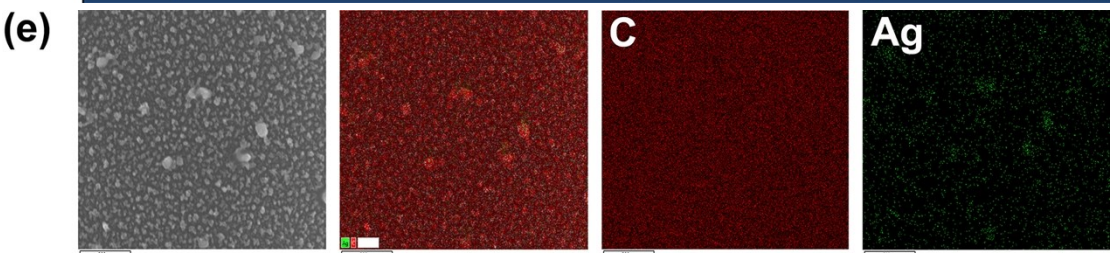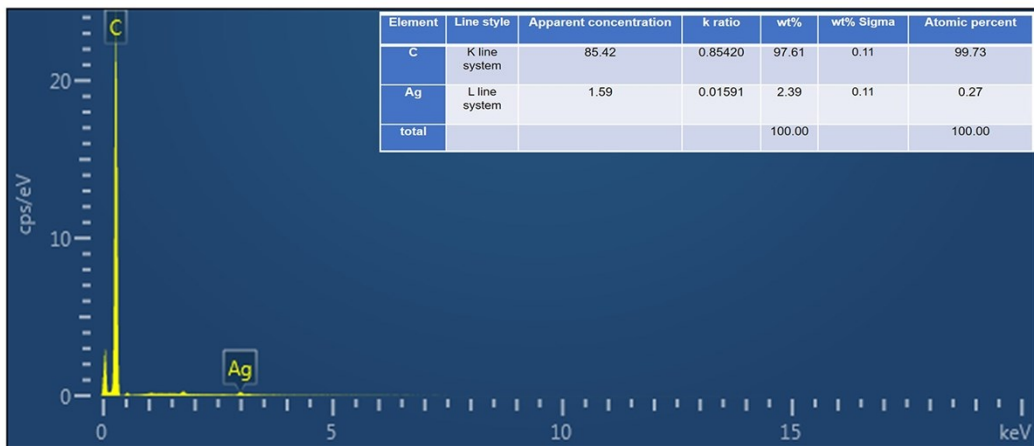

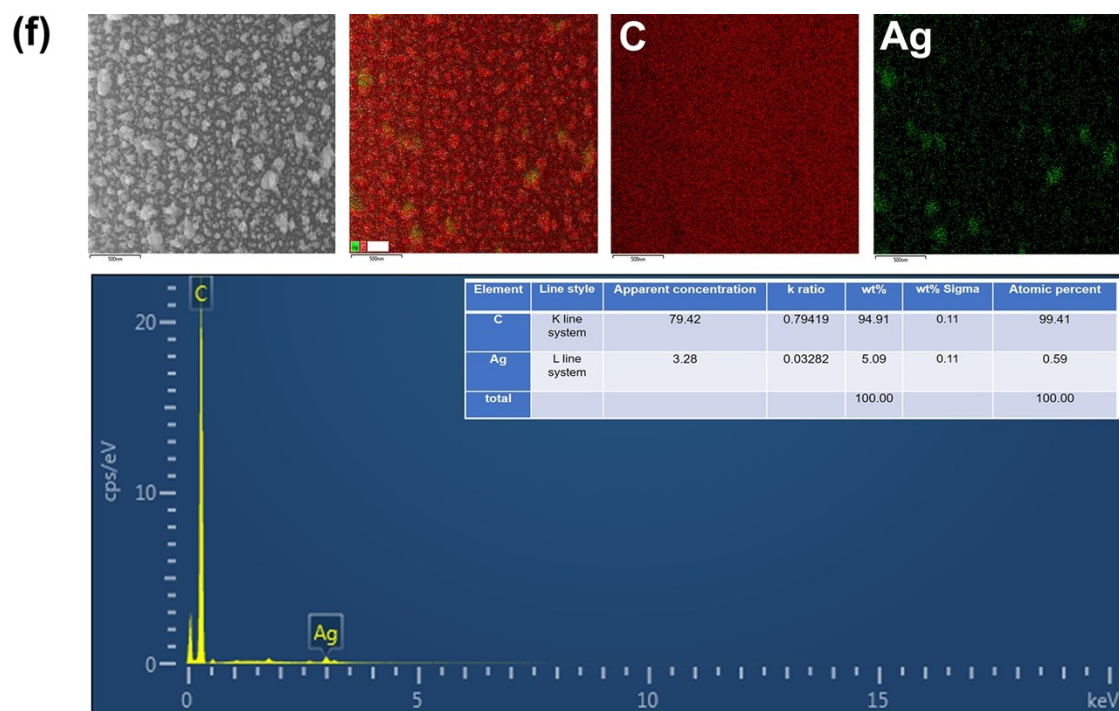

**Fig. S1** EDS mapping of the prepared Ag nanoparticles on carbon fiber by SAG method. (a) the blank carbon fiber (b) V-Ag-30min (c) V-Ag-60min (d) V-Ag-120min (e) V-Ag-240min (f) V-Ag-360min.
